# Supplementary material
Source: HighWire-hosted journal article supplement (http://www.qdcxjkg.com/highwire/filestream/113524/field_highwire_adjunct_files/0/onelinesupplemental_r1clean.pdf)
Supplement: onelinesupplemental_r1clean.pdf [file onelinesupplemental_r1clean.pdf]

**Clean version**

**SUPPLEMENTAL MATERIAL AND RESULTS**

**SUPPLEMENTAL METHOD**

Online Supplement Table S1: Assay-on-demand™ from Applied Biosystems, used for real-time TaqMan PCR.

| <b>Gene of interest</b>       | <b>Abbreviation</b> | <b>Assay number</b> |
|-------------------------------|---------------------|---------------------|
| Cyclooxygenase type 1 isoform | COX-1               | Mm00477214_m1       |
| Cyclooxygenase type 2 isoform | COX-2               | Mm00478374_m1       |
| Thromboxane synthase          | TXBS                | Mm00495553_m1       |
| Prostacyclin synthase         | PGIS                | Mm00447271_m1       |
| TP receptor                   | TPr                 | Mm00436917_m1       |
| IP receptor                   | IPr                 | Mm00801938_m1       |
| 18S ribosomal protein         | 18S                 | Hs99999901_s1       |

## SUPPLEMENTAL RESULTS

**Online Supplement Table S2:** Characteristics of 14 OSA patients free of cardiovascular risk factor before and after treatment with continuous positive airway pressure (CPAP) (median duration treatment: 166 (79-279) days and median use of treatment: 5.9 (4.2-7.1) h/night). Data are presented as median (10<sup>th</sup> and 90<sup>th</sup> percentiles).

|                                                    | Before CPAP          | After CPAP          | p                 |
|----------------------------------------------------|----------------------|---------------------|-------------------|
| BMI (kg/m <sup>2</sup> )                           | 24.5 (22.8-28.4)     | 26.0 (23.0-29.1)    | 0.5               |
| AHI (events/h)                                     | 30.4 (19.9-49.6)     | 0.59 (0.0-8.9)      | <b>&lt;0.0001</b> |
| RDI (events/h)                                     | 38.02 (24.2-59.3)    | 3.4 (0.1-12.0)      | <b>&lt;0.0001</b> |
| Minimal SaO <sub>2</sub> (%)                       | 79.0 (72.8-87.0)     | 87.0 (79.8-93.4)    | <b>0.008</b>      |
| Mean SaO <sub>2</sub> (%)                          | 94.0 (91.0-95.3)     | 95.0 (93.2-96.9)    | <b>0.003</b>      |
| SaO <sub>2</sub> <90% (%TST)                       | 2.7 (0.0-15.3)       | 0.05 (0.0-1.0)      | <b>0.02</b>       |
| RAI (events/h)                                     | 32.0 (12.9-43.0)     | 2.5 (0.5-9.9)       | <b>0.0001</b>     |
| Urinary 11-dTXB <sub>2</sub><br>(pg/mg creatinine) | 610.2 (311.1-1020.5) | 688.8 (302.1-992.8) | 0.8               |

CPAP, continuous positive airway pressure; BMI, Body mass index; AHI, apnea/hypopnea index; RDI, respiratory disturbance index; SaO<sub>2</sub>, arterial oxygen saturation; TST, total sleep time; RAI, respiratory arousal index; 11-dTXB<sub>2</sub>, 11-dehydrothromboxane B<sub>2</sub>.

**Online Supplement Table S3:** Characteristics of 21 OSA patients with cardiovascular risk factor before and after treatment with continuous positive airway pressure (CPAP) (median duration treatment: 178 (59-289) days and median use of treatment: 6.1 (4.5-7.5) h/night). Data are presented as median (10<sup>th</sup> and 90<sup>th</sup> percentiles).

|                                                    | Before CPAP          | After CPAP            | p                 |
|----------------------------------------------------|----------------------|-----------------------|-------------------|
| BMI (kg/m <sup>2</sup> )                           | 29.6 (24.0-34.5)     | 28.8 (24.3-31.7)      | 0.6               |
| AHI (events/h)                                     | 38.2 (22.0-66.6)     | 0.65 (0.0-7.5)        | <b>&lt;0.0001</b> |
| RDI (events/h)                                     | 55.2 (29.9-66.1)     | 4.2 (0.5-10.1)        | <b>0.0001</b>     |
| Minimal SaO <sub>2</sub> (%)                       | 82.5 (71.2-86.9)     | 91.0 (86.4-92.0)      | <b>0.02</b>       |
| Mean SaO <sub>2</sub> (%)                          | 92.0 (87.0-94.1)     | 95.2 (93.0-97.1)      | <b>0.008</b>      |
| SaO <sub>2</sub> <90% (%TST)                       | 5.5 (0.1-28.6)       | 0.0 (0.0-0.4)         | <b>0.04</b>       |
| RAI (events/h)                                     | 30.2 (18.2-73.1)     | 2.45 (0.0-9.2)        | <b>0.0009</b>     |
| Urinary 11-dTXB <sub>2</sub><br>(pg/mg creatinine) | 655.6 (222.5-1293.1) | 610.6 (3296.2-1389.2) | 0.8               |

CPAP, continuous positive airway pressure; BMI, Body mass index; AHI, apnea/hypopnea index; RDI, respiratory disturbance index; SaO<sub>2</sub>, arterial oxygen saturation; TST, total sleep time; RAI, respiratory arousal index; 11-dTXB<sub>2</sub>, 11-dehydrothromboxane B<sub>2</sub>.
